# Supplementary material for: Population Genetic Structure of Aphis gossypii Glover (Hemiptera: Aphididae) in Korea
Source: MDPI journal article supplement (doi:10.3390/insects10100319), 2019-09-26
Supplement: s1 [file s1]

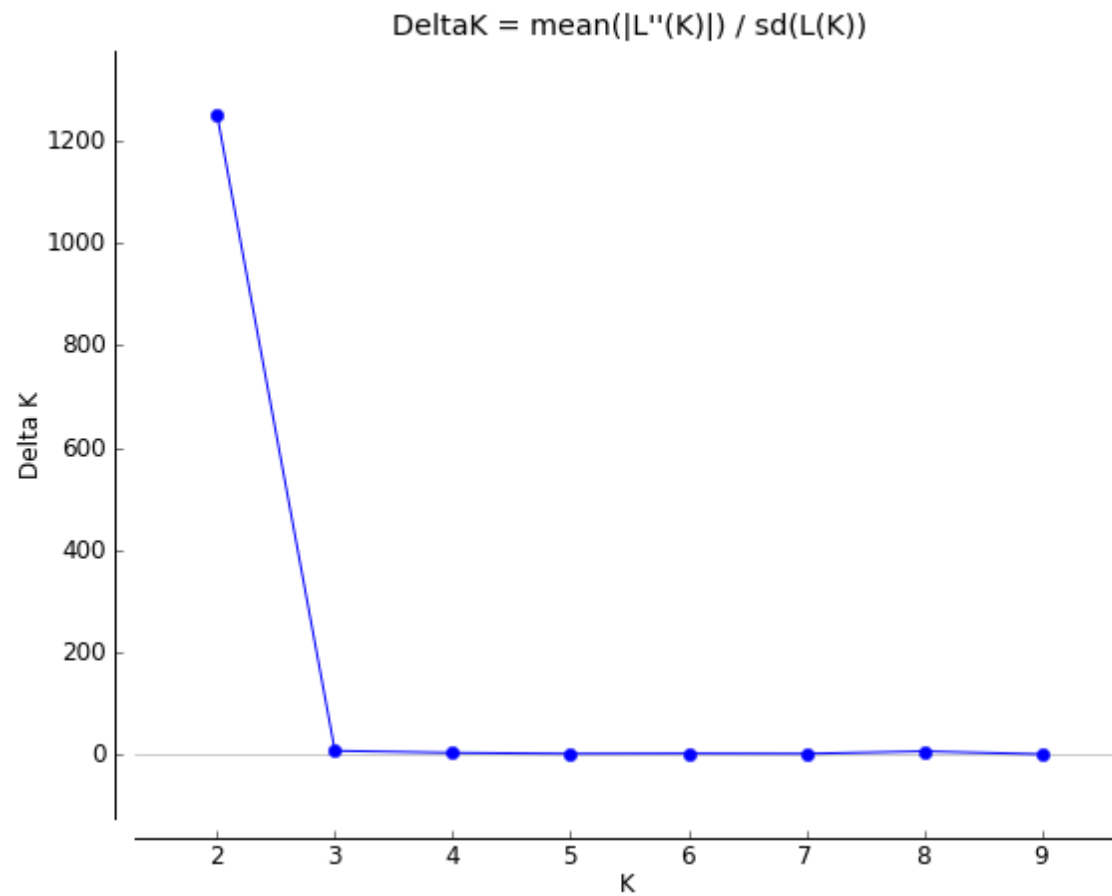

Supplementary Figure 1. Bayesian inference to identify suitable cluster ( $K$ ) and cluster proportion using STRUCUTRE for *Aphis gossypii* in Korea. Delta  $K$  are analyzed against number of genetic clusters ( $K$ ).
