# Supplementary material for: Population Genetic Structure of Aphis gossypii Glover (Hemiptera: Aphididae) in Korea
Source: MDPI journal article supplement (doi:10.3390/insects10100319), 2019-09-26
Supplement: s1 [file s1]

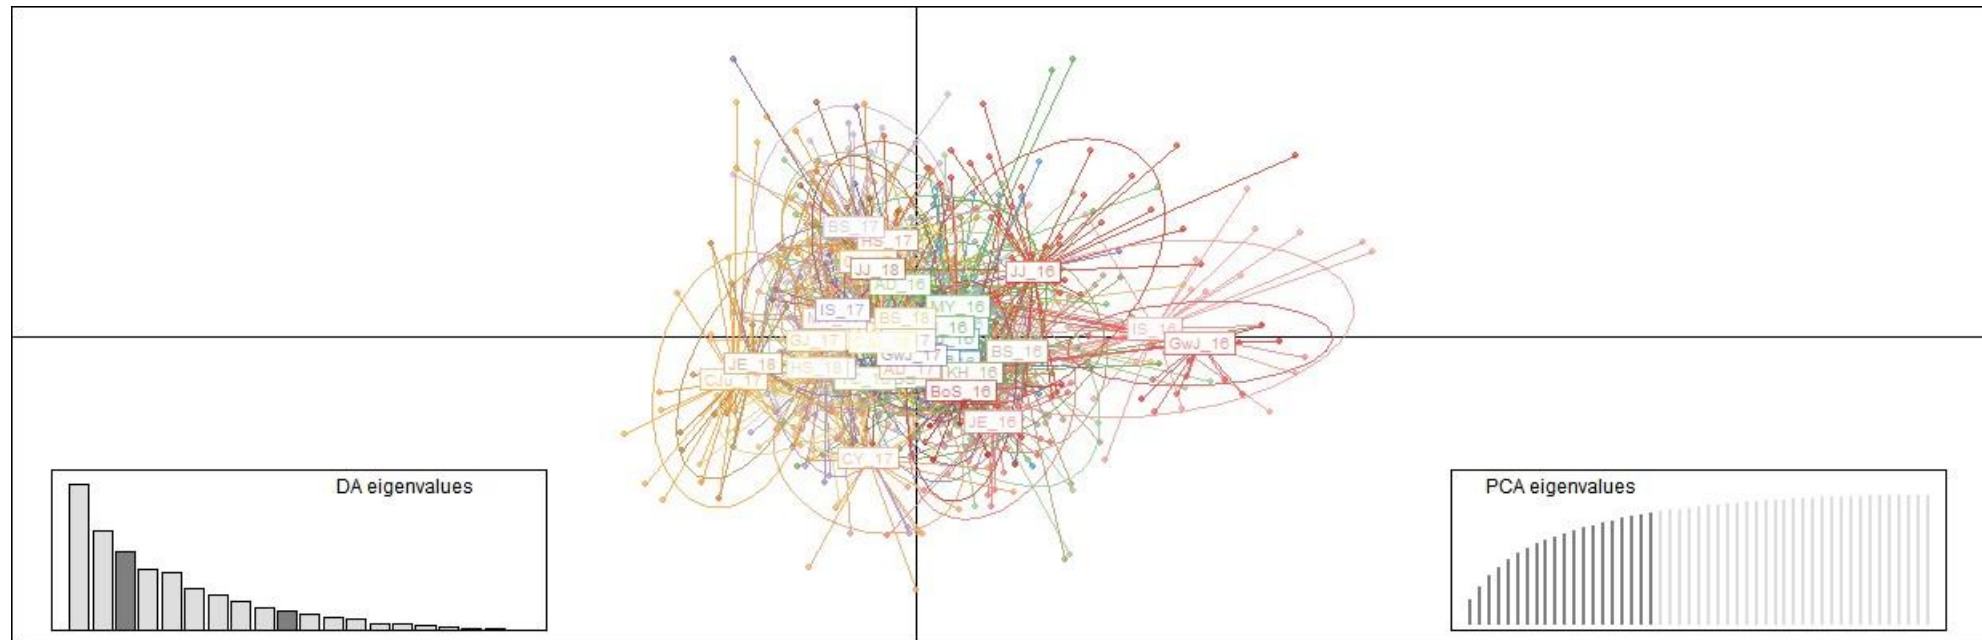

Supplementary Figure S2. Scatter plot of DAPC analysis of the nine populations using “adegent” in R package (table 2 indicates the population ID). Dots: individuals, ellipses: populations.
