# Supplementary material for: Population Genetic Structure of Aphis gossypii Glover (Hemiptera: Aphididae) in Korea
Source: Insects. 2019 Sep 26;10(10):319. doi: 10.3390/insects10100319 (PMC6835795; doi:10.3390/insects10100319)
Supplement: Supplementary file 1 [file insects-10-00319-s001.zip]

Archive with 7 entries (7 files):
- Supplementary Fig.1.pdf
- Supplementary Fig.2.pdf
- Supplementary Table 1.docx
- Supplementary Table 2.docx
- Supplementary Table 3.docx
- Supplementary Table 4.docx
- Supplementary Table 5.docx
