# Supplementary material for: Population Genetic Structure of Aphis gossypii Glover (Hemiptera: Aphididae) in Korea
Source: Insects. 2019 Sep 26;10(10):319. doi: 10.3390/insects10100319 (PMC6835795; doi:10.3390/insects10100319)
Supplement: Supplementary file 1 [file insects-10-00319-s001.zip › Supplementary Table 3.docx]

Supplementary Table 3. Pairwise *F*ST [ENA] values (lower-left matrix), and pairwise *F*ST values and significance (upper-right matrix) based on 8 microsatellite loci between the populations of *A. gossypii* in Korea (2016).

|  | PT_16 | DJ_16 | HS_16 | GJ_16 | CJu_16 | GS_16 | CJ_16 | YC_16 | AD_16 | MY_16 | JiJ_16 | KH_16 | BS_16 | IS_16 | JE_16 | GwJ_16 | BoS_16 | JJ_16 |
| --- | --- | --- | --- | --- | --- | --- | --- | --- | --- | --- | --- | --- | --- | --- | --- | --- | --- | --- |
| PT_16 | - | 0.1376* | 0.0514* | 0.1766* | 0.1167* | 0.1549* | 0.1091* | 0.0783* | 0.1030* | 0.1007* | 0.1503* | 0.0930* | 0.1329* | 0.2228* | 0.1083* | 0.3425* | 0.1319* | 0.1387* |
| DJ_16 | 0.1397 | - | 0.0721* | 0.2321* | 0.0629* | 0.2275* | 0.1396* | 0.1313* | 0.2376* | 0.0368* | 0.0144NS | 0.0512* | 0.1592* | 0.2366* | 0.1253* | 0.3632* | 0.1352* | 0.1731* |
| HS_16 | 0.0500 | 0.0713 | - | 0.1807* | 0.0732* | 0.1686* | 0.0808* | 0.0440* | 0.1466* | 0.0503* | 0.0938* | 0.0320* | 0.0734* | 0.1860* | 0.0470* | 0.3102* | 0.0643* | 0.1310* |
| GJ_16 | 0.1590 | 0.2196 | 0.1565 | - | 0.2472* | **0.0047NS** | 0.1967* | 0.2906* | 0.1722* | 0.1497* | 0.2652* | 0.1622* | 0.2380* | 0.1331* | 0.2518* | 0.2433* | 0.2805* | 0.2445* |
| CJu_16 | 0.1189 | 0.0628 | 0.0699 | 0.2319 | - | 0.2321* | 0.1414* | 0.1206* | 0.2333* | 0.0761* | 0.0691* | 0.0877* | 0.1445* | 0.2592* | 0.1451* | 0.3936* | 0.1415* | 0.1703* |
| GS_16 | 0.1508 | 0.2204 | 0.1531 | **0.0093** | 0.2265 | - | 0.1896* | 0.2684* | 0.1734* | 0.1493* | 0.2612* | 0.1551* | 0.2274* | 0.1449* | 0.2369* | 0.2645* | 0.2595* | 0.2306* |
| CJ_16 | 0.1027 | 0.1417 | 0.0749 | 0.1787 | 0.1434 | 0.1772 | - | 0.1731* | 0.1197* | 0.0825* | 0.1615* | 0.0722* | 0.0870* | 0.1496* | 0.0916* | 0.2457* | 0.1387* | 0.0941* |
| YC_16 | 0.0816 | 0.1328 | 0.0516 | 0.2744 | 0.1209 | 0.2630 | 0.1750 | - | 0.2503* | 0.1232* | 0.1474* | 0.1077* | 0.1799* | 0.3127* | 0.1167* | **0.4396*** | 0.1155* | 0.2097* |
| AD_16 | 0.0984 | 0.2396 | 0.1414 | 0.1549 | 0.2361 | 0.1677 | 0.1184 | 0.2552 | - | 0.1757* | 0.2485* | 0.1570* | 0.1489* | 0.1863* | 0.1786* | 0.2736* | 0.2411* | 0.1818* |
| MY_16 | 0.0997 | 0.0363 | 0.0453 | 0.1378 | 0.0749 | 0.1417 | 0.0757 | 0.1303 | 0.1688 | - | 0.0663* | 0.0261NS | 0.1237* | 0.1359* | 0.0997* | 0.2606* | 0.1074* | 0.1239* |
| JiJ_16 | 0.1525 | 0.0139 | 0.0921 | 0.2507 | 0.0692 | 0.2555 | 0.1632 | 0.1473 | 0.2515 | 0.0660 | - | 0.0791* | 0.1819* | 0.2679* | 0.1591* | 0.3960* | 0.1686* | 0.1953* |
| KH_16 | 0.0927 | 0.0556 | 0.0292 | 0.1553 | 0.0919 | 0.1507 | 0.0678 | 0.1126 | 0.1546 | 0.0255 | 0.0843 | - | 0.0813* | 0.1539* | 0.0389* | 0.2643* | 0.0665* | 0.1306* |
| BS_16 | 0.1280 | 0.1598 | 0.0683 | 0.2148 | 0.1459 | 0.2119 | 0.0874 | 0.1804 | 0.1484 | 0.1147 | 0.1832 | 0.0776 | - | 0.2001* | 0.0476* | 0.3241* | 0.0970* | 0.1374* |
| IS_16 | 0.2066 | 0.2377 | 0.1740 | 0.1330 | 0.2583 | 0.1375 | 0.1364 | 0.3116 | 0.1724 | 0.1265 | 0.2679 | 0.1459 | 0.1902 | - | 0.2280* | 0.0526NS | 0.2650* | 0.2238* |
| JE_16 | 0.1052 | 0.1263 | 0.0474 | 0.2374 | 0.1464 | 0.2281 | 0.0936 | 0.1174 | 0.1815 | 0.0955 | 0.1602 | 0.0369 | 0.0484 | 0.2234 | - | 0.3399* | 0.0488* | 0.1471* |
| GwJ_16 | 0.3183 | 0.3527 | 0.2939 | 0.2337 | 0.3836 | 0.2360 | 0.2319 | **0.4287** | 0.2609 | 0.2412 | 0.3860 | 0.2453 | 0.3124 | 0.0573 | 0.3300 | - | 0.4014* | 0.3462* |
| BoS_16 | 0.1312 | 0.1359 | 0.0653 | 0.2662 | 0.1421 | 0.2534 | 0.1407 | 0.1157 | 0.2443 | 0.1051 | 0.1690 | 0.0679 | 0.0985 | 0.2619 | 0.0491 | 0.3912 | - | 0.1643* |
| JJ_16 | 0.1330 | 0.1753 | 0.1227 | 0.2272 | 0.1713 | 0.2236 | 0.0883 | 0.2116 | 0.1748 | 0.1171 | 0.1966 | 0.1262 | 0.1319 | 0.2035 | 0.1442 | 0.3234 | 0.1640 | - |

*: *P*<0.05 (significant value); NS: not significant.
